# Supplementary material for: A rapid loop-mediated isothermal amplification assay for the detection of root rot in soybean caused by Phytophthora sojae
Source: Royal Society of Chemistry journal article supplement (doi:10.1039/d5ay00924c), 2025-01-01
Supplement: d5ay00924c1.pdf [file d5ay00924c1.pdf]

## **Rapid Loop-Mediated Isothermal Amplification Assay for the Detection of Root Rot in Soybean Caused by *Phytophthora sojae***

Akli Zarouri<sup>a</sup>, Anil Meher<sup>c</sup>, Dean Malvick<sup>b</sup>, Crystal Floyd<sup>b</sup>, Megan McCaghey<sup>b</sup>, Haneen Aboubakr<sup>a</sup>, Abdenmour Abbas<sup>a,c</sup>

### **AUTHOR ADDRESS:**

<sup>a</sup> Department of Bioproducts and Biosystems Engineering, University of Minnesota-Twin Cities, 2004 Folwell Ave, St. Paul, MN, 55108, USA.

<sup>b</sup> Department Of Plant Pathology, University of Minnesota-Twin Cities, 1991 Upper Buford Cir, 495 Borlaug Hall, St Paul, MN 55108, USA

<sup>c</sup> PureBioX Inc., 1000 Westgate Dr, Saint Paul, MN 55114

\*Corresponding author: [aabbas@umn.edu](mailto:aabbas@umn.edu)

## LAMP Primer design

**Table S1** Nucleic acid sequences of four LAMP primer sets tested for specificity, with “Ps-ITS-LAMP 3” selected for use

| Primer sets            |     | Primer sequence                                  | Primer sequence (5' to 3') | GenBank           |
|------------------------|-----|--------------------------------------------------|----------------------------|-------------------|
| Ps-ITS-LAMP 1          | F3  | GCGTGACGTTGTTGGTTGT                              |                            | MT367710.1        |
|                        | B3  | AAGCCAAGCCTCACACAG                               |                            |                   |
|                        | FIP | CGCGAATCGAACACTCCTCCATCTGCCTGTATGGCCAGTC         |                            |                   |
|                        | BIP | TATGGTTGGCTTCGGCTGAACATACGGTTCACCAGCCCAT         |                            |                   |
|                        | LF  | GCAGCAGACAAACCGGTCG                              |                            |                   |
|                        | LB  | ATGCGCTTATTGGATGCTTTTCC                          |                            |                   |
| Ps-ITS-LAMP 2          | F3  | CCACGTGAACCGTATCAACA                             |                            | KU211332.1        |
|                        | B3  | CATCCACTGCTGAAAGTTGC                             |                            |                   |
|                        | FIP | ATAGAGCCCGCCACACAGCATGCTCTGTGTGGCTGTCT           |                            |                   |
|                        | BIP | CCTCCTCGTGGGGAAGTGGATAGACTTTCGTCCCCACAGTA        |                            |                   |
|                        | LF  | CCGCCGACTTTGACATCGA                              |                            |                   |
|                        | LB  | GAGCCCACTTTTTAAACCCATTCTT                        |                            |                   |
| Ps-ITS-LAMP 3          | F3  | <b>CCACGTGAACCGTATCAACA</b>                      |                            | <b>AY590266.1</b> |
|                        | B3  | <b>CATCCACTGCTGAAAGTTGC</b>                      |                            |                   |
|                        | FIP | <b>ATAGAGCCCGCCACACAGCATGCTCTGTGTGGCTGTCT</b>    |                            |                   |
|                        | BIP | <b>CCTCCTCGTGGGGAAGTGGATAGACTTTCGTCCCCACAGTA</b> |                            |                   |
|                        | LF  | <b>GCCGCCGACTTTGACGT</b>                         |                            |                   |
|                        | LB  | <b>GAGCCCACTTTTTAAACCCATTCTT</b>                 |                            |                   |
| Ps-ITS-LAMP assay<br>4 | F3  | GGCGTTTAATGGAGGAGTGT                             |                            | AY590266.1        |
|                        | B3  | CGCAGAGACAACACAGAGTT                             |                            |                   |
|                        | FIP | CTACGGTTCACCAGCCCATACCGTTGGCTTCGGCTGAACAA        |                            |                   |
|                        | BIP | TGAGGCTTGCTTTTGAACCGGCCAAATGGATCGACCCTCG         |                            |                   |
|                        | LF  | CAGCAGGAAAAGCATCCAATAAGC                         |                            |                   |
|                        | LB  | GTTGCGAAGTAGGGTGGCG                              |                            |                   |

**Table S2** Sensitivity, specificity, and accuracy of nested PCR and conventional PCR assays for diagnosing Phytophthora root rot in soybean seedlings using a 5 µL DNA sample

|                   | Nested PCR | PCR    |
|-------------------|------------|--------|
| True positives    | 32/32      | 6/32   |
| False positives   | 0          | 0      |
| True negatives    | 34/34      | 34/34  |
| False negatives   | 0          | 26     |
| Assay sensitivity | 100%       | 18.75% |
| Assay specificity | 100%       | 100%   |
| Assay accuracy    | 100%       | 60.6%  |

## Protocol S1: DNA Extraction Protocol

*\* This protocol applies to uninfected and infected soybean plant samples. Additionally, to prevent cross-contamination, we ensured that uninfected and infected samples were handled separately throughout the protocol.*

Before beginning the protocol, clean and disinfect the fume hood with a 10% bleach solution, leaving it on for 10 minutes, then rinse with deionized water before use. Clean the mortar and pestle with soap, deionized water, and a 10% bleach solution, rinsing thoroughly between uses.

### I. Sample Preparation

1. The required volume of cetyltrimethylammonium bromide (CTAB) buffer was preheated and incubated at 60°C for 15 minutes.
2. Infected parts of the soybean plant were cut and isolated from the roots and stem.
3. The samples were placed in a mortar, liquid nitrogen was added, and they were ground with a pestle until a fine powder was formed.
4. A total of 80 mg from each sample was measured and placed into labeled microcentrifuge tubes.
5. 700  $\mu\text{L}$  of CTAB buffer was added to the samples, which were briefly vortexed and centrifuged for 15–30 seconds.
6. The samples were then incubated at 60°C for 30 minutes.

### II. DNA Extraction

1. New 1.5 mL microcentrifuge tubes were prepared and labeled according to the corresponding samples.
2. After incubation, the samples were centrifuged at  $12,000 \times g$  for 1 minute, and 200  $\mu\text{L}$  of the supernatant was transferred to the respective tubes.
3. 500  $\mu\text{L}$  of 3 M NaCl was added to each sample tube, followed by vortexing and centrifugation at  $12,000 \times g$  for 1 minute.
4. 150  $\mu\text{L}$  of the resulting supernatant was transferred to a new 1.5 mL tube already containing 200  $\mu\text{L}$  of the previously extracted supernatant (from Step 2).
5. 350  $\mu\text{L}$  of 100% ethanol was added to each sample tube, followed by brief vortexing.
6. 700  $\mu\text{L}$  of supernatant from each sample was transferred to spin columns and centrifuged at  $12,000 \times g$  for 1 minute.
7. The collection tubes were discarded, and the mini-columns were transferred to new 2 mL collection tubes.

### III. Purification of Extracted DNA

1. 500  $\mu\text{L}$  of Wash 1 buffer was pipetted into each spin column and centrifuged at  $12,000 \times g$  for 1 minute.
2. The mini-columns were transferred to new 2 mL collection tubes.
3. 500  $\mu\text{L}$  of Wash 2 buffer was pipetted into each spin column and centrifuged at  $12,000 \times g$  for 1 minute.
4. The mini-columns were transferred again to new 2 mL collection tubes.
5. The columns were centrifuged at  $12,000 \times g$  for 1 minute to remove excess buffer.

### IV. Final Elution

1. The mini-columns were transferred to new 1.5 mL microcentrifuge tubes.
2. 100  $\mu\text{L}$  of nuclease-free water was added to each mini-column, followed by centrifugation at  $12,000 \times g$  for 1 minute.
3. The mini-columns were discarded, and the 1.5 mL tubes were closed, labeled, and stored at -20°C until further use.

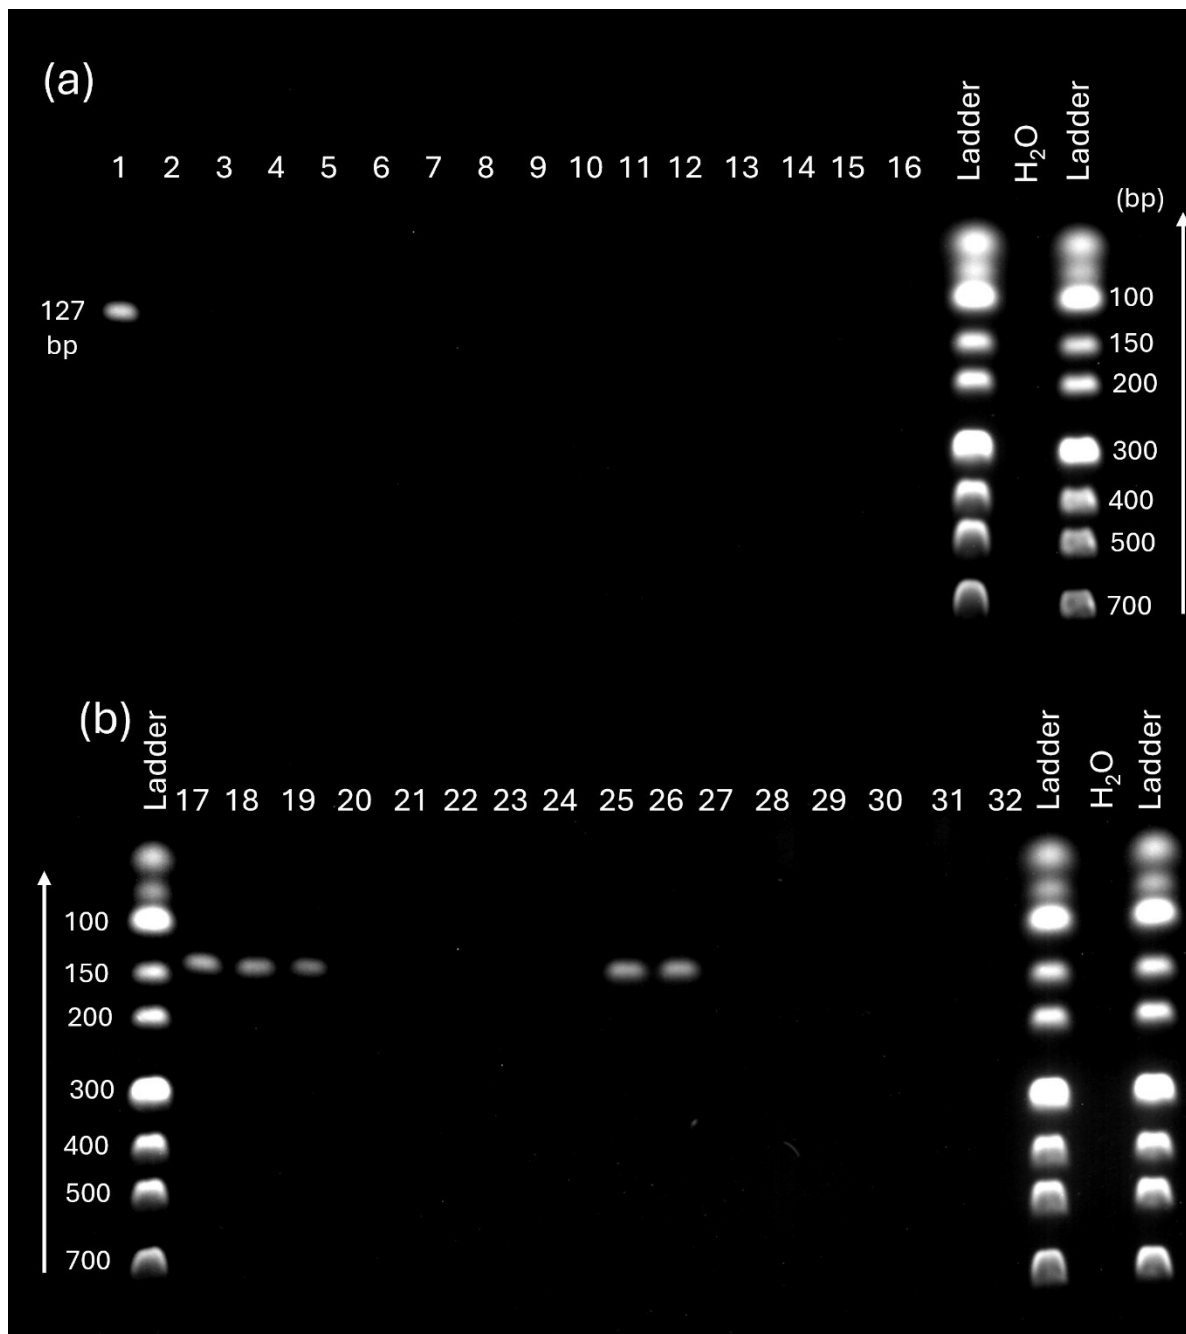

**Figure S1.** Conventional PCR results for the detection of *P. sojae* in DNA extracted from 32 inoculated soybean seedlings, each tested in duplicate. Samples were run on two 2% agarose gels (Low Range DNA Ladder used as a size marker): (a) seedlings 1–16 and (b) seedlings 17–32. Amplicons were visualized under UV light. Only 6 out of 32 samples showed bands at the expected size (127 bp), highlighting the limited sensitivity of the conventional PCR assay. NTC: no-template control (H<sub>2</sub>O). Gels ran from bottom to top.

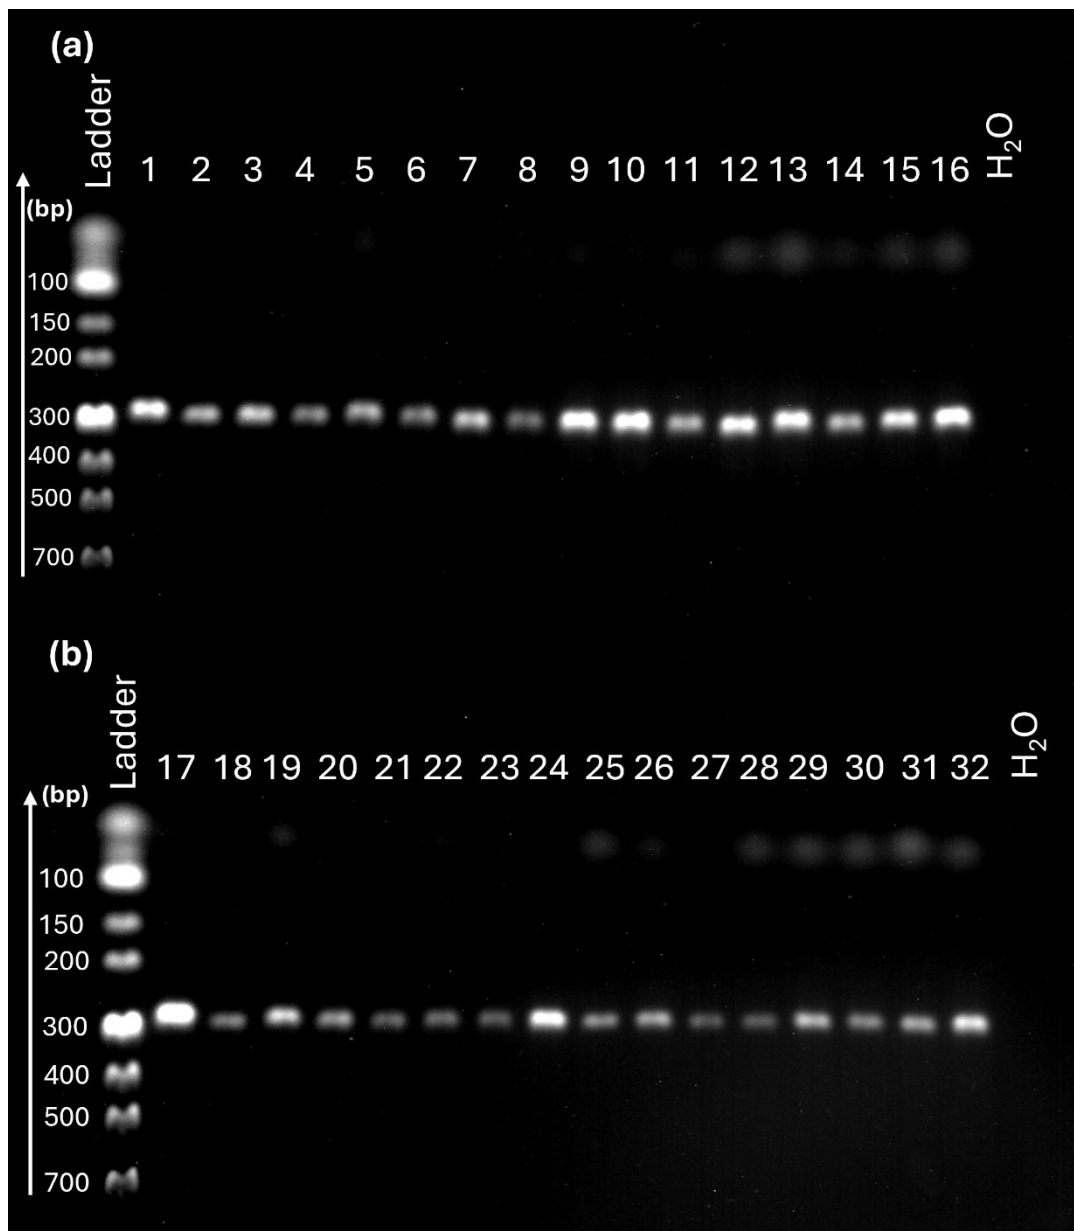

**Figure S2.** Nested PCR of DNA from *P. sojae*-infected soybean seedlings on 3% agarose gels (Low Range DNA Ladder used as a size marker). (a) samples 1–16, (b) samples 17–32; all infected samples show bands at the expected 267 bp, confirming detection; negative control: no-template (H<sub>2</sub>O). Gels ran from bottom to top.

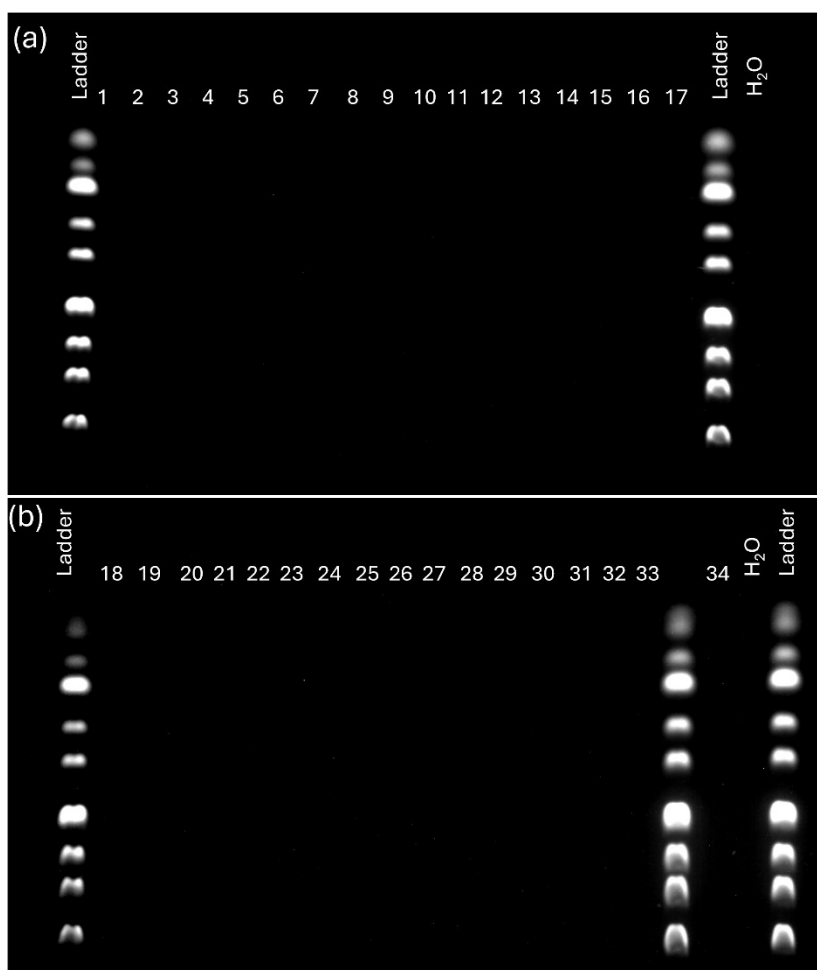

**Figure S3.** Gel electrophoresis analysis of nested PCR products from 34 control (uninfected) soybean seedlings. DNA was extracted and tested from seedlings labeled (a) 1–17 and (b) 18–34. No amplification was observed on the 2% agarose gel, confirming the absence of *P. sojae* infection. H<sub>2</sub>O was used as a no-template control (NTC). Low Range DNA Ladder used as a size marker. Gels ran from bottom to top. Each sample was tested in duplicate.

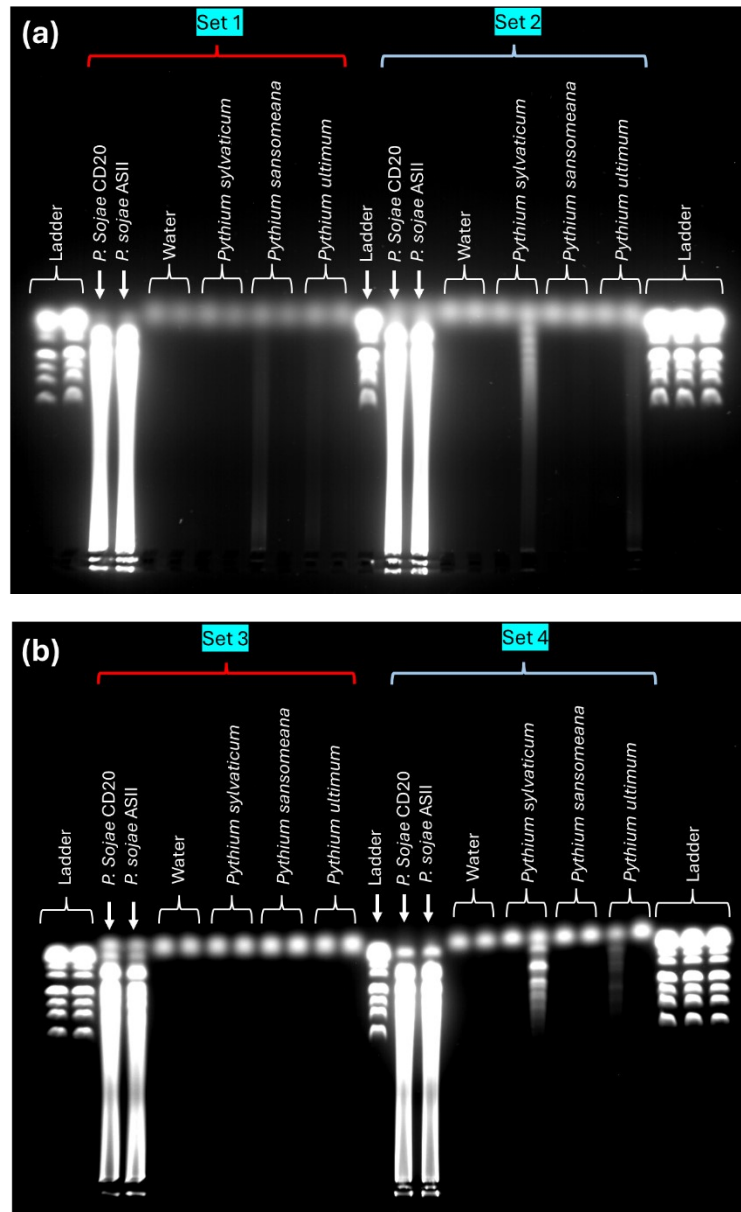

**Figure S4** Agarose gel electrophoresis (1%) of loop-mediated isothermal amplification (LAMP) products from four primer sets designed for *Phytophthora sojae* detection, tested against *Phytophthora sojae* (strains CD20 and AS11) and three *Pythium* species (*Pythium sylvaticum*, *Pythium sansomeana*, and *Pythium ultimum*). The reaction mixtures were incubated at 65°C for 30 minutes. (a) Results for Ps-ITS-LAMP 1 and Ps-ITS-LAMP 2. (b) Results for Ps-ITS-LAMP 3 and Ps-ITS-LAMP 4. Ps-ITS-LAMP 3 was selected as the most effective, demonstrating the highest specificity and clarity. 1 kb DNA ladder used as a size marker. Gels ran from bottom to top. The experiment was run twice and in duplicate for each primer set.





**Figure S5** Specificity evaluation of the LAMP assay for detecting *Phytophthora sojae* isolates. A panel of 25 species was blind-tested and labeled 1–25. (a, b) Colorimetric LAMP detection results, where a positive reaction is indicated by a color change from pink to yellow. Gel electrophoresis analysis was performed to confirm amplification, with smearing patterns denoting successful LAMP reactions and the absence of smears indicating no amplification. 1 kb DNA ladder used as a size marker. Gels ran from bottom to top. Species corresponding to each number are as follows:

1 – *Pythium sylvaticum*, 2 – *Pythium ultimum*, 3 – *Phytophthora sansomeana*, 4 – *Fusarium oxysporum*, 5 – *Fusarium solani*, 6 – *Pythium torulosum*, 7 – *Phytophthora sojae* As11, 8 – *Phytophthora sojae* Cd20, 9 – *Pythium irregulare*, 10 – *Pythium heterothallicum*, 11 – *Rhizoctonia solani*, 12 – *Clonostachys rosea*, 13 – *Diaporthe longicolla*, 14 – *Diaporthe caulivora*, 15 – *Sclerotinia sclerotiorum*, 16 – *Cadophora gregata* genotype A, 17 – *Pythium attrantheridium*, 18 – *Pythium oopapillum*, 19 – *Phytophthora sojae* As11, 20 – *Phytophthora cactorum*, 21 – *Phytophthora sojae* Cd20, 22 – *Phytophthora cinnamomi*, 23 – *Pythium intermedium*, 24 – *Phytophthora nicotianae*, and 25 – *Pythium recalcitrans*. Repeated entries of *P. sojae* isolates (As11 and Cd20) represent distinct biological replicates.

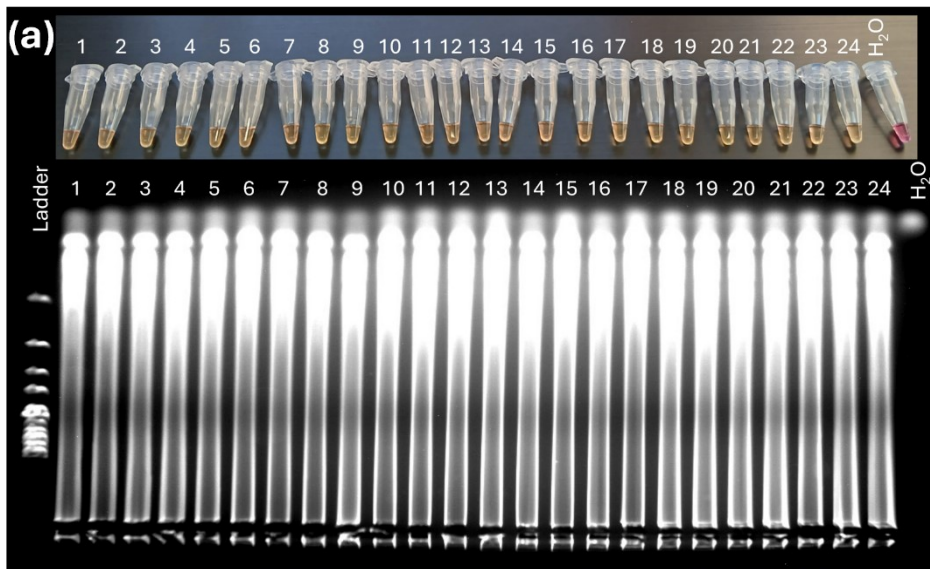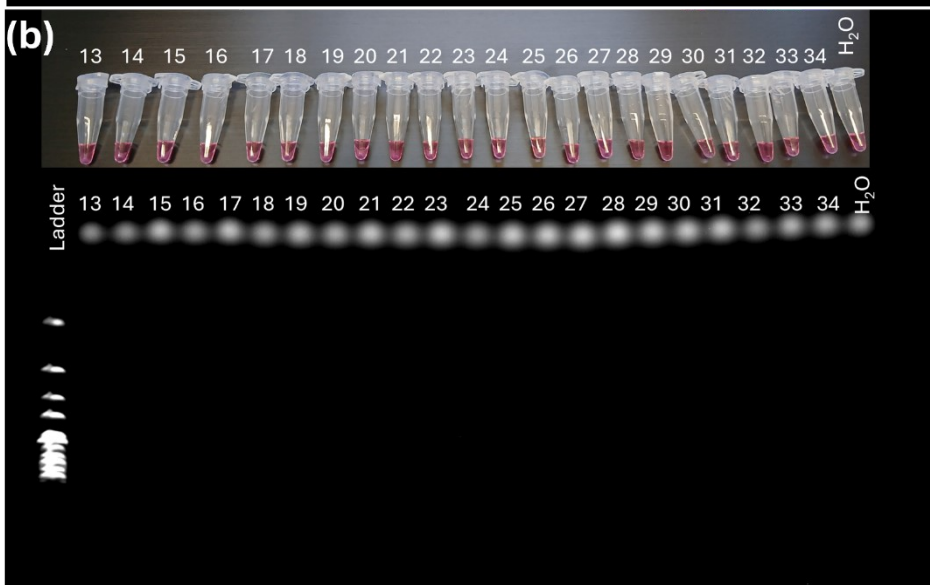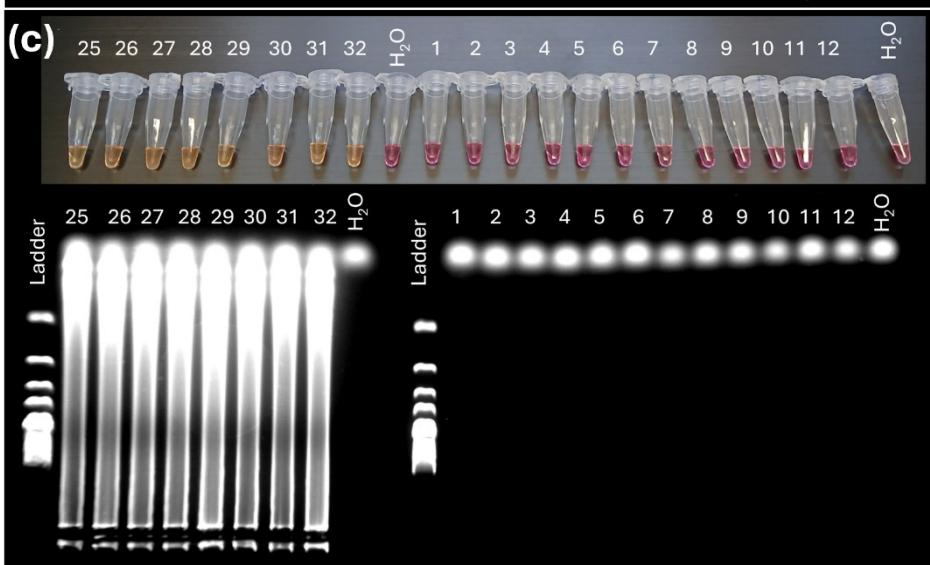

**Fig. S6** Replicate 2 of naked-eye detection of *Phytophthora sojae* using 1% agarose gel electrophoresis of loop-mediated isothermal amplification (LAMP) products from 34 control (uninfected) and 32 *P. sojae*-infected seedlings. (1 kb DNA ladder used as a size marker). Gels ran from bottom to top.

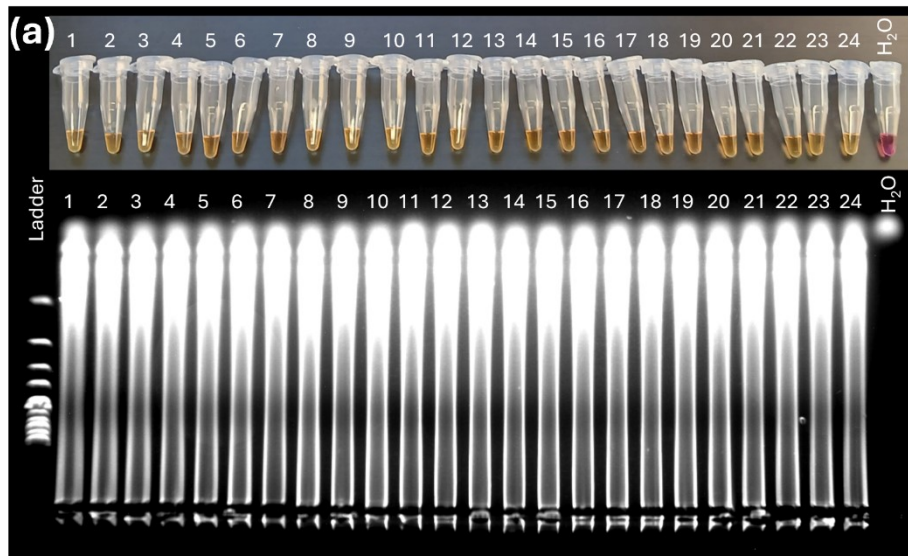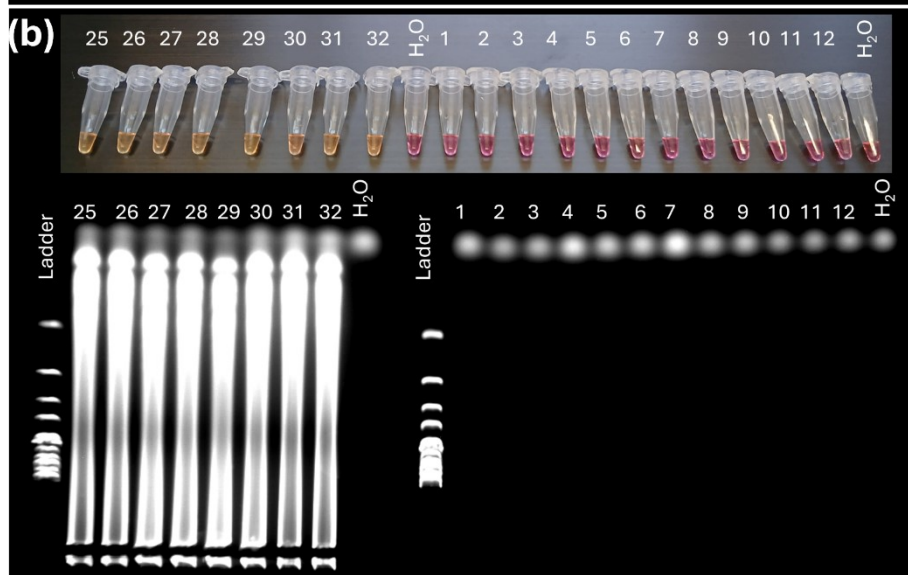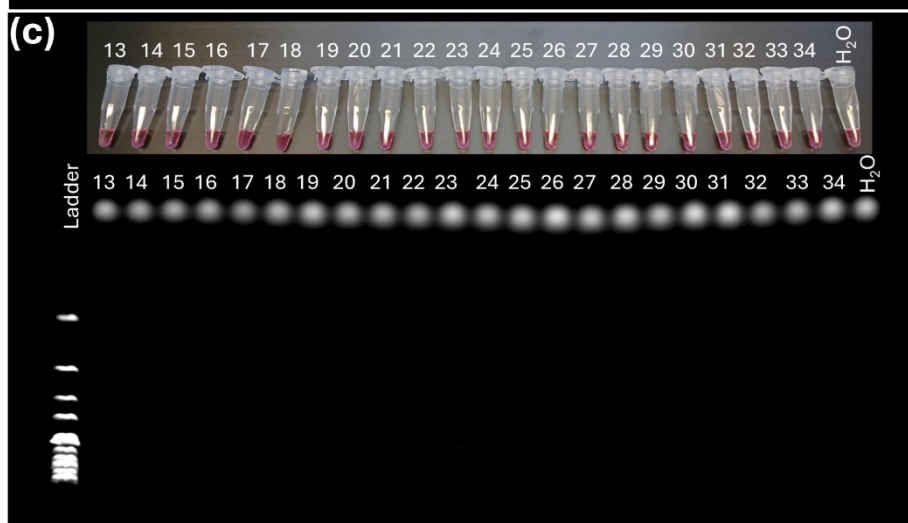

**Fig. S7** Replicate 3 of naked-eye detection of *Phytophthora sojae* using 1% agarose gel electrophoresis of loop-mediated isothermal amplification (LAMP) products from 34 control (uninfected) and 32 *P. sojae*-infected seedlings. (1 kb DNA ladder used as a size marker). Gels ran from bottom to top.

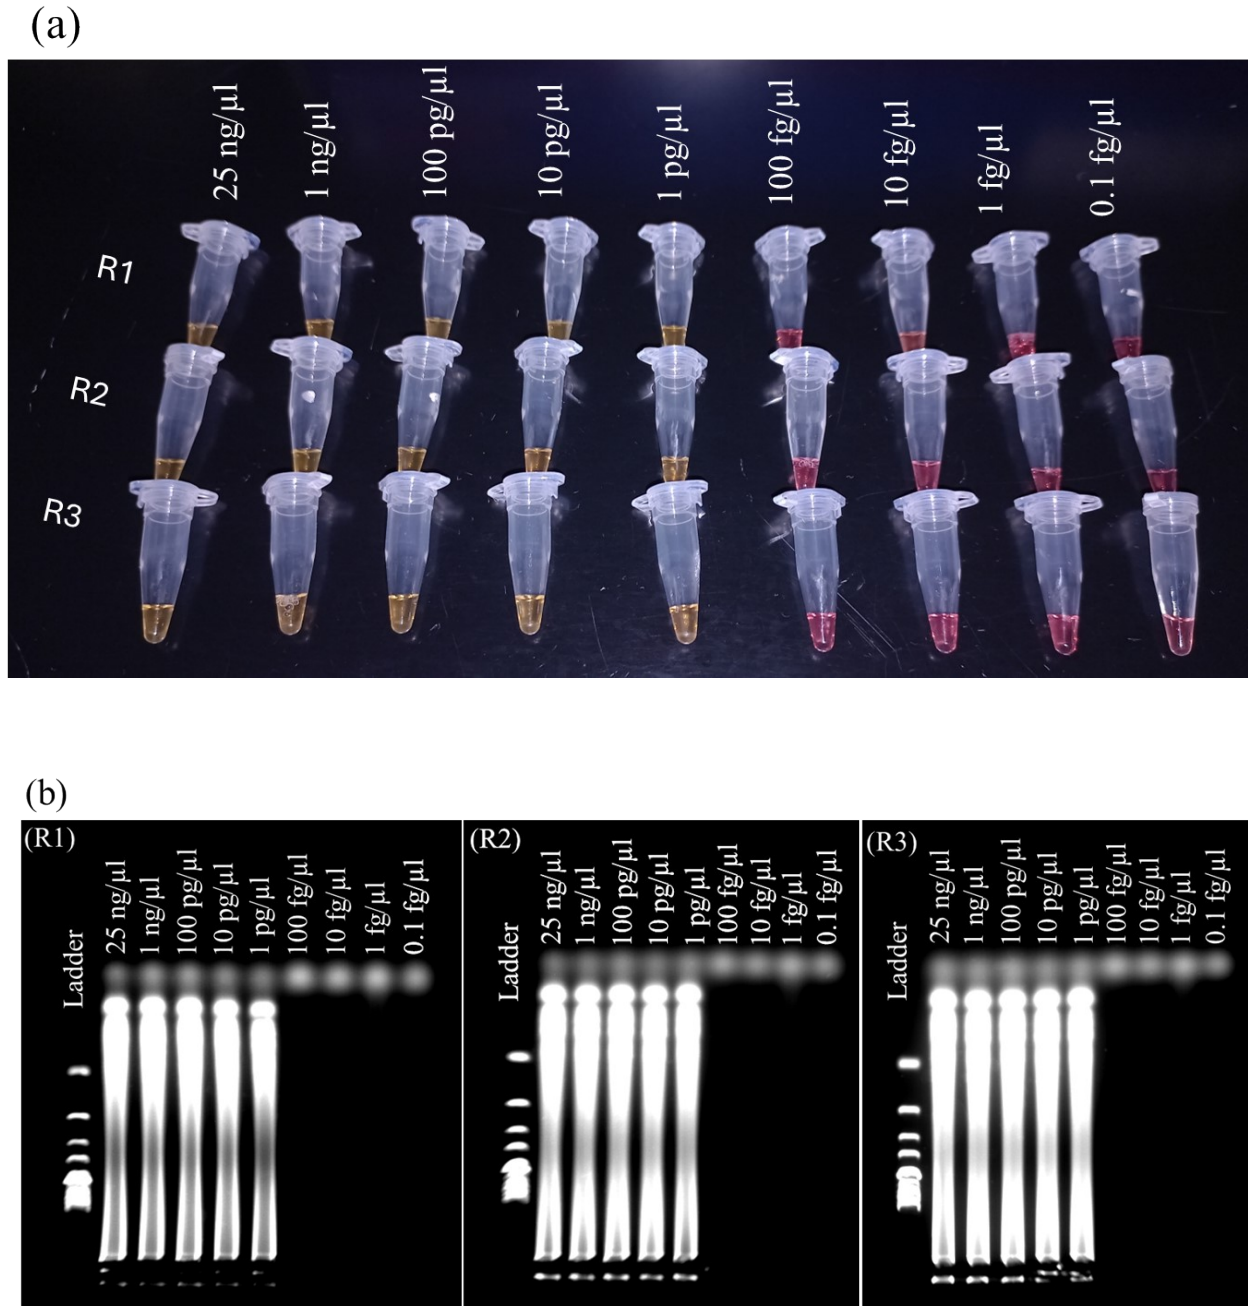

**Fig. S8** Analytical Sensitivity of the LAMP Assay. The limit of detection (LOD) of the LAMP assay was determined using serial dilutions of genomic DNA from *P. sojae* isolate CD20. For each LAMP reaction, 1  $\mu$ L of DNA template was used, with concentrations ranging from 15 ng/ $\mu$ L to 10 fg/ $\mu$ L.. (a) Colorimetric detection demonstrates positive

reactions with a color change from pink to yellow. (b) Results were confirmed using a 1% agarose gel, showing characteristic DNA smears for positive samples, (1 kb DNA ladder used as a size marker). Gels ran from bottom to top. Each assay was tested in three experimental replicates (R).
